# Supplementary material for: Thermo-responsive allele of sucrose synthase 3 (Sus3) provides high-temperature tolerance during the ripening stage in rice (Oryza sativa L.)
Source: PubMed Central journal article supplement — Breed Sci. 2018 Jun 23;68(3):336–42. doi: 10.1270/jsbbs.18007 (PMC6081304; doi:10.1270/jsbbs.18007), 2018-06-23
Supplement: 68_18007_1.pdf [file 68_18007_1.pdf]

Supplemental Table 1. Sequences of primes used in genetic mapping

| Primer name                          | Forward primer (5'→3')  | Reverse primer (5'→3')     | Marker type     |
|--------------------------------------|-------------------------|----------------------------|-----------------|
| Tak6166-3                            | ACATCCGATAATGGAGTCGACG  | GGGACGTCGACGCAGAAC         | InDel           |
| ERF2-1<br>(for Koshihikari genotype) | TGAATTAGTTTATTATTACTC   | TATCGCTACTCACAAATTACTTTTC  | Dominant marker |
| ERF2-1<br>(for Habataki genotype)    | TTAATTAGTTTATTATTATTC   | TGATCGCTACTCGCAAATTACTTTTT | marker          |
| ERF2-2<br>(for Koshihikari genotype) | AGTAATAATTAGTAATCCCTTCG | TCGACATAGTCAACAAGCAGC      | Dominant marker |
| ERF2-2<br>(for Habataki genotype)    | AGTAATAATTAGTACTCCCTCCG | TCGACATAGTCAACAAGCAGC      | marker          |
| AP2-indel                            | CGCGGAATCGTCGGGTGAAC    | AAAACGCGTAACCGTGACGT       | InDel           |
| RM21971                              | GCTGACCAGCCACTCTGAAACC  | TATGGTTTGAAAGGACGCGAGAGG   | SSR             |

Supplemental Table 2. Sequences of primes used in qRT-PCR

| Primer name | Forward primer (5'→3') | Reverse primer (5'→3') |
|-------------|------------------------|------------------------|
| RT-OsUbi1   | TGAAGACCCTGACTGGGAAG   | CACGGTTCAACAACATCCAG   |
| RT-Sus3     | GTTGAGGAGCTGAGTGTC     | TGTGCGCACGAAGAAAGTTG   |
| RT-Sus1     | ATCGTGAGAAGCTGAAGGAC   | CATTGACCCTCACATACTCC   |
| RT-Sus2     | GTTTCGATGCCTTGATCGAAG  | AATGTAGTCCCAGACACCAG   |
| RT-Sus4     | GATCATGTTCCGGAACAAGG   | ACTGAAGTCTTCCCAGACTC   |
| RT-Sus5/7   | GCTGAGTTTCAAGCGAATGG   | GCCTCTTACCCTTTGATACG   |
| RT-Sus6     | CCAAGTTAGAGCTCTGGAAG   | CGGTTCCAACCTTACATTCG   |
